# Supplementary material for: Histopathology of osteogenesis imperfecta bone. Supramolecular assessment of cells and matrices in the context of woven and lamellar bone formation using light, polarization and ultrastructural microscopy
Source: PubMed Central journal article supplement — Bone Rep. 2020 Dec 1;14:100734. doi: 10.1016/j.bonr.2020.100734 (PMC7898004; doi:10.1016/j.bonr.2020.100734), 2020-12-01
Supplement: mmc1.pdf [file mmc1.pdf]

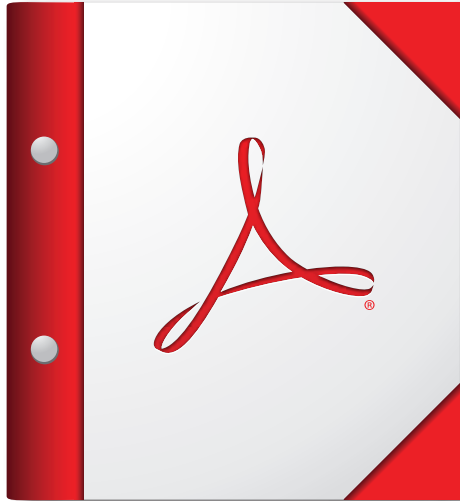

**For the best experience, open this PDF portfolio in  
Acrobat X or Adobe Reader X, or later.**

[Get Adobe Reader Now!](#)
